# Supplementary material for: Doublecortin engages the microtubule lattice through a cooperative binding mode involving its C-terminal domain
Source: eLife. 2022 Apr 29;11:e66975. doi: 10.7554/eLife.66975 (PMC9122500; doi:10.7554/eLife.66975)
Supplement: Supplementary file 1. [file elife-66975-supp1.xlsx]

## Sheet: Sheet1
Table S1. Complete list of crosslinking sites (and their associated crosslinked peptides) identified for MT-DCX construct using LC-SDA photo-chemical crosslinking*
Id	z	m/z	Pr 1	Pr 2	Peptide1_Peptide2	(start1-stop1)_(start2-stop2)	Selected Sites
1	4	394.718	sp|Q2XVP4|TBA1B_PIG Tubulin alpha-1B chain OS=Sus scrofa GN=TUBA1B PE=1 SV=1	DCX	GHYTIGK-DKTSR	(106-112)_(12-16)	[I110-K13]
2	5	613.289	DCX	sp|Q2XVP4|TBA1B_PIG Tubulin alpha-1B chain OS=Sus scrofa GN=TUBA1B PE=1 SV=1	MNGLPSPTHSAHCSFYR-EDMAALEK	(23-39)_(423-430)	[S28-M425;S28-A426;T30-M425;T30-A426;S32-M425;S32-A426;S36-M425;S36-A426;Y38-M425;Y38-A426]
3	5	720.94	DCX	sp|Q2XVP4|TBA1B_PIG Tubulin alpha-1B chain OS=Sus scrofa GN=TUBA1B PE=1 SV=1	MNGLPSPTHSAHCSFYR-YMACCLLYR	(23-39)_(312-320)	[S32-C315]
4	4	417.493	DCX	sp|Q2XVP4|TBA1B_PIG Tubulin alpha-1B chain OS=Sus scrofa GN=TUBA1B PE=1 SV=1	TLQALSNEKK-HGK	(42-51)_(309-311)	[K50-H309]
5	4	639.601	sp|P02554|TBB_PIG Tubulin beta chain OS=Sus scrofa PE=1 SV=1	DCX	GHYTEGAELVDSVLDVVR-KVR	(104-121)_(54-56)	[E108-K54]
6	5	511.882	sp|P02554|TBB_PIG Tubulin beta chain OS=Sus scrofa PE=1 SV=1	DCX	GHYTEGAELVDSVLDVVR-KVR	(104-121)_(54-56)	[Y106-K54]
7	5	511.882	sp|P02554|TBB_PIG Tubulin beta chain OS=Sus scrofa PE=1 SV=1	DCX	GHYTEGAELVDSVLDVVR-KVR	(104-121)_(54-56)	[V113-K54;D114-K54]
8	5	537.501	sp|P02554|TBB_PIG Tubulin beta chain OS=Sus scrofa PE=1 SV=1	DCX	GHYTEGAELVDSVLDVVRK-KVR	(104-122)_(54-56)	[L112-K54]
9	4	517.78	DCX	sp|Q3ZBU7|TBB4A_BOVIN Tubulin beta-4A chain OS=Bos taurus GN=TUBB4A PE=2 SV=1	YFKGIVYAVSSDR-HGR	(64-76)_(307-309)	[K66-H307]
10	5	793.016	sp|P02554|TBB_PIG Tubulin beta chain OS=Sus scrofa PE=1 SV=1	DCX	GHYTEGAELVDSVLDVVR-YFKGIVYAVSSDRFR	(104-121)_(64-78)	[Y106-K66;T107-K66;G104-K66;H105-K66;E108-K66]
11	6	977.639	sp|Q2XVP4|TBA1B_PIG Tubulin alpha-1B chain OS=Sus scrofa GN=TUBA1B PE=1 SV=1	DCX	ECISIHVGQAGVQIGNACWELYCLEHGIQPDGQMPSDK-GIVYAVSSDRFR	(3-40)_(67-78)	[Y24-V69;Y24-Y70;G10-Y70;Q11-Y70;A12-Y70;G13-Y70;V14-Y70;Q15-Y70;I16-Y70;G17-Y70;N18-Y70;A19-Y70;C20-Y70;W21-Y70;E22-Y70;L23-Y70;C25-Y70;L26-Y70;E27-Y70;H28-Y70;G29-Y70;I30-Y70;Q31-Y70]
12	4	445.257	DCX	sp|Q2XVP4|TBA1B_PIG Tubulin alpha-1B chain OS=Sus scrofa GN=TUBA1B PE=1 SV=1	SFDALLADLTR-KSK	(79-89)_(164-166)	[D81-K164;A82-K164;L83-K164]
13	5	588.913	sp|Q767L7|TBB5_PIG	DCX	ISVYYNEATGGK-SFDALLADLTR	(47-58)_(79-89)	[Y50-D81;Y50-A82;Y50-L83;Y51-D81;Y51-A82;Y51-L83;T55-D81;T55-A82;T55-L83]
14	4	493.032	DCX	sp|Q2XVP4|TBA1B_PIG Tubulin alpha-1B chain OS=Sus scrofa GN=TUBA1B PE=1 SV=1	SLSDNINLPQGVR-KSK	(90-102)_(164-166)	[S90-K164;S92-K164;L91-K164;D93-K164]
15	5	978.079	DCX	sp|P02550|TBA1A_PIG Tubulin alpha-1A chain OS=Sus scrofa GN=TUBA1A PE=1 SV=1	KIGSMDELEEGESYVCSSDNFFK-VGINYEPPTVVPGGDLAK	(112-134)_(353-370)	[K112-E358;K112-V363;K112-P364;K112-G365;K112-G366;K112-D367;K112-L368;K112-A369]
16	4	548.542	sp|Q3ZBU7|TBB4A_BOVIN Tubulin beta-4A chain OS=Bos taurus GN=TUBB4A PE=2 SV=1	DCX	ISEQFTAMFR-KVEYTK	(381-390)_(135-140)	[I381-K135;E383-K135]
17	4	756.138	DCX	sp|P02554|TBB_PIG Tubulin beta chain OS=Sus scrofa PE=1 SV=1	KVEYTKNVNPNWSVNVK-EEYPDR	(135-151)_(157-162)	[K135-E157;K140-E157]
18	6	717.55	sp|P02554|TBB_PIG Tubulin beta chain OS=Sus scrofa PE=1 SV=1	DCX	GHYTEGAELVDSVLDVVRK-KVEYTKNVNPNWSVNVK	(104-122)_(135-151)	[V113-K135;V113-K140]
19	6	717.55	sp|P02554|TBB_PIG Tubulin beta chain OS=Sus scrofa PE=1 SV=1	DCX	GHYTEGAELVDSVLDVVRK-KVEYTKNVNPNWSVNVK	(104-122)_(135-151)	[Y106-K135;Y106-K140;T107-K135;T107-K140;G104-K135;G104-K140;H105-K135;H105-K140;E108-K135;E108-K140;G109-K135;G109-K140;A110-K135;A110-K140;E111-K135;E111-K140]
20	4	646.351	DCX	sp|Q3ZBU7|TBB4A_BOVIN Tubulin beta-4A chain OS=Bos taurus GN=TUBB4A PE=2 SV=1	KVEYTKNVNPNWSVNVK-HGR	(135-151)_(307-309)	[K140-H307]
21	5	949.461	sp|Q2XVP4|TBA1B_PIG Tubulin alpha-1B chain OS=Sus scrofa GN=TUBA1B PE=1 SV=1	DCX	AYHEQLSVAEITNACFEPANQMVKCDPR-NVNPNWSVNVK	(281-308)_(141-151)	[K304-N149]
22	4	727.109	DCX	sp|P02554|TBB_PIG Tubulin beta chain OS=Sus scrofa PE=1 SV=1	NVNPNWSVNVKTSANMK-EEYPDR	(141-157)_(157-162)	[K151-E157]
23	4	863.937	DCX	sp|P02554|TBB_PIG	NVNPNWSVNVKTSANMK-INVYYNEAAGNK	(141-157)_(47-58)	[K151-V49;K151-Y50]
24	6	717.55	sp|P02554|TBB_PIG Tubulin beta chain OS=Sus scrofa PE=1 SV=1	DCX	GHYTEGAELVDSVLDVVRK-KVEYTKNVNPNWSVNVK	(104-122)_(135-151)	[G104-K140;H105-K140]
25	4	639.58	DCX	sp|Q2XVP4|TBA1B_PIG Tubulin alpha-1B chain OS=Sus scrofa GN=TUBA1B PE=1 SV=1	TSANMKAPQSLASSNSAQAR-HGK	(152-171)_(309-311)	[K157-H309]
26	5	517.467	DCX	sp|Q3ZBU7|TBB4A_BOVIN Tubulin beta-4A chain OS=Bos taurus GN=TUBB4A PE=2 SV=1	TSANMKAPQSLASSNSAQAR-HGR	(152-171)_(307-309)	[K157-H307]
27	4	756.369	DCX	sp|P02554|TBB_PIG Tubulin beta chain OS=Sus scrofa PE=1 SV=1	TSANMKAPQSLASSNSAQAR-EEYPDR	(152-171)_(157-162)	[K157-E157]
28	5	598.709	DCX	sp|Q2XVP4|TBA1B_PIG Tubulin alpha-1B chain OS=Sus scrofa GN=TUBA1B PE=1 SV=1	TSANMKAPQSLASSNSAQAR-GHYTIGK	(152-171)_(106-112)	[K157-G106;K157-H107]
29	5	659.134	DCX	sp|P02554|TBB_PIG	TSANMKAPQSLASSNSAQAR-IREEYPDR	(152-171)_(155-162)	[K157-P160;K157-D161]
30	4	780.888	DCX	sp|Q2XVP4|TBA1B_PIG	TSANMKAPQSLASSNSAQAR-EDMAALEK	(152-171)_(423-430)	[K157-E423]
31	4	901.954	DCX	sp|Q2T9S0|TBB3_BOVIN Tubulin beta-3 chain OS=Bos taurus GN=TUBB3 PE=1 SV=1	TSANMKAPQSLASSNSAQAR-EVDEQMLAIQSK	(152-171)_(325-336)	[K157-D327;K157-E328;K157-Q329]
32	4	780.888	DCX	sp|Q2XVP4|TBA1B_PIG Tubulin alpha-1B chain OS=Sus scrofa GN=TUBA1B PE=1 SV=1	TSANMKAPQSLASSNSAQAR-EDMAALEK	(152-171)_(423-430)	[K157-E429]
33	4	810.144	DCX	sp|Q2XVP4|TBA1B_PIG	TSANMKAPQSLASSNSAQAR-EDAANNYAR	(152-171)_(97-105)	[K157-E97;K157-D98]
34	4	825.687	DCX	sp|Q2XVP4|TBA1B_PIG Tubulin alpha-1B chain OS=Sus scrofa GN=TUBA1B PE=1 SV=1	TSANMKAPQSLASSNSAQAR-EIIDLVLDR	(152-171)_(113-121)	[K157-E113;K157-I114;K157-I115]
35	4	915.954	DCX	sp|P02554|TBB_PIG Tubulin beta chain OS=Sus scrofa PE=1 SV=1	TSANMKAPQSLASSNSAQAR-EVDEQMLNVQNK	(152-171)_(325-336)	[K157-E325]
36	5	725.782	DCX	sp|Q2XVP4|TBA1B_PIG Tubulin alpha-1B chain OS=Sus scrofa GN=TUBA1B PE=1 SV=1	TSANMKAPQSLASSNSAQAR-QLFHPEQLITGK	(152-171)_(85-96)	[K157-P89;K157-E90;K157-Q91;K157-L92;K157-I93]
37	4	978.49	DCX	sp|Q3ZBU7|TBB4A_BOVIN Tubulin beta-4A chain OS=Bos taurus GN=TUBB4A PE=2 SV=1	TSANMKAPQSLASSNSAQAR-NSSYFVEWIPNNVK	(152-171)_(337-350)	[K157-V342]
38	5	787.403	DCX	sp|Q2XVP4|TBA1B_PIG	TSANMKAPQSLASSNSAQAR-NLDIERPTYTNLNR	(152-171)_(216-229)	[K157-I219;K157-E220;K157-R221]
39	5	787.403	DCX	sp|Q2XVP4|TBA1B_PIG	TSANMKAPQSLASSNSAQAR-NLDIERPTYTNLNR	(152-171)_(216-229)	[K157-D218]
40	4	979.758	DCX	sp|Q2XVP4|TBA1B_PIG Tubulin alpha-1B chain OS=Sus scrofa GN=TUBA1B PE=1 SV=1	TSANMKAPQSLASSNSAQAR-AVFVDLEPTVIDEVR	(152-171)_(65-79)	[K157-V68]
41	4	979.758	DCX	sp|Q2XVP4|TBA1B_PIG Tubulin alpha-1B chain OS=Sus scrofa GN=TUBA1B PE=1 SV=1	TSANMKAPQSLASSNSAQAR-AVFVDLEPTVIDEVR	(152-171)_(65-79)	[K157-L70]
42	5	861.042	DCX	sp|P02554|TBB_PIG	TSANMKAPQSLASSNSAQAR-GHYTEGAELVDSVLDVVRK	(152-171)_(104-122)	[K157-Y106;K157-T107;K157-E108;K157-G109;K157-A110;K157-E111;K157-L112]
43	5	909.631	DCX	sp|Q2XVP4|TBA1B_PIG	TSANMKAPQSLASSNSAQAR-AFVHWYVGEGMEEGEFSEAR	(152-171)_(403-422)	[K157-G410;K157-E411]
44	5	909.631	sp|Q2XVP4|TBA1B_PIG Tubulin alpha-1B chain OS=Sus scrofa GN=TUBA1B PE=1 SV=1	DCX	AFVHWYVGEGMEEGEFSEAR-TSANMKAPQSLASSNSAQAR	(403-422)_(152-171)	[M413-K157]
45	4	1056.26	DCX	sp|Q2XVP4|TBA1B_PIG Tubulin alpha-1B chain OS=Sus scrofa GN=TUBA1B PE=1 SV=1	TSANMKAPQSLASSNSAQAR-TIGGGDDSFNTFFSETGAGK	(152-171)_(41-60)	[K157-G43;K157-G44;K157-G45;K157-D46;K157-D47;K157-S48;K157-F49;K157-N50;K157-T51;K157-F52;K157-F53;K157-S54;K157-E55]
46	6	772.391	sp|Q2XVP4|TBA1B_PIG Tubulin alpha-1B chain OS=Sus scrofa GN=TUBA1B PE=1 SV=1	DCX	QLFHPEQLITGKEDAANNYAR-TSANMKAPQSLASSNSAQAR	(85-105)_(152-171)	[I93-K157]
47	5	993.685	sp|Q2XVP4|TBA1B_PIG Tubulin alpha-1B chain OS=Sus scrofa GN=TUBA1B PE=1 SV=1	DCX	AYHEQLSVAEITNACFEPANQMVK-TSANMKAPQSLASSNSAQAR	(281-304)_(152-171)	[T292-K157;I291-K157;N293-K157;A294-K157;C295-K157;F296-K157;E297-K157]
48	4	920.228	sp|Q6B856|TBB2B_BOVIN Tubulin beta-2B chain OS=Bos taurus GN=TUBB2B PE=1 SV=2	DCX	INVYYNEATGNKYVPR-APQSLASSNSAQAR	(47-62)_(158-171)	[K58-A158]
49	5	728.754	sp|Q2XVP4|TBA1B_PIG Tubulin alpha-1B chain OS=Sus scrofa GN=TUBA1B PE=1 SV=1	DCX	AFVHWYVGEGMEEGEFSEAR-ASPTPQKTSAK	(403-422)_(286-296)	[M413-K292]
50	5	668.952	sp|P02554|TBB_PIG Tubulin beta chain OS=Sus scrofa PE=1 SV=1	DCX	GHYTEGAELVDSVLDVVR-TSAKSPGPMRR	(104-121)_(293-303)	[Y106-T293;Y106-S294;T107-T293;T107-S294;E108-T293;E108-S294;G109-T293;G109-S294;A110-T293;A110-S294;E111-T293;E111-S294]
51	5	654.547	sp|P02554|TBB_PIG	DCX	GHYTEGAELVDSVLDVVR-ASPTPQKTSAK	(104-121)_(286-296)	[Y106-A295;T107-A295]
52	4	614.567	sp|Q3ZBU7|TBB4A_BOVIN Tubulin beta-4A chain OS=Bos taurus GN=TUBB4A PE=2 SV=1	DCX	ISEQFTAMFR-TSAKSPGPMR	(381-390)_(293-302)	[E383-K296]
53	4	907.712	sp|Q3ZCJ7|TBA1C_BOVIN Tubulin alpha-1C chain OS=Bos taurus GN=TUBA1C PE=1 SV=1	DCX	AVCMLSNTTAVAEAWAR-APQSLASSNSAQAR	(374-390)_(158-171)	[S379-A158;S379-Q160]
54	5	843.636	sp|Q2XVP4|TBA1B_PIG Tubulin alpha-1B chain OS=Sus scrofa GN=TUBA1B PE=1 SV=1	DCX	FDGALNVDLTEFQTNLVPYPR-APQSLASSNSAQAR	(244-264)_(158-171)	[T253-A158;T257-A158;Y262-A158]
55	4	820.416	sp|Q3ZBU7|TBB4A_BOVIN Tubulin beta-4A chain OS=Bos taurus GN=TUBB4A PE=2 SV=1	DCX	NSSYFVEWIPNNVK-APQSLASSNSAQAR	(337-350)_(158-171)	[S339-Q160;S339-S161;Y340-Q160;Y340-S161;F341-S161;V342-S161;E343-S161]
56	4	481.507	DCX	sp|Q2XVP4|TBA1B_PIG	APQSLASSNSAQAR-HGK	(158-171)_(309-311)	[S165-H309;S167-H309]
57	4	782.377	sp|Q2XVP4|TBA1B_PIG Tubulin alpha-1B chain OS=Sus scrofa GN=TUBA1B PE=1 SV=1	DCX	AFVHWYVGEGMEEGEFSEAR-ENK	(403-422)_(172-174)	[Y408-E172;Y408-N173]
58	5	606.533	sp|Q2XVP4|TBA1B_PIG Tubulin alpha-1B chain OS=Sus scrofa GN=TUBA1B PE=1 SV=1	DCX	AVFVDLEPTVIDEVR-ENKDFVRPK	(65-79)_(172-180)	[F67-K174;V68-K174;D69-K174;L70-K174;E71-K174]
59	5	683.567	sp|P02554|TBB_PIG Tubulin beta chain OS=Sus scrofa PE=1 SV=1	DCX	GHYTEGAELVDSVLDVVRK-ENKDFVRPK	(104-122)_(172-180)	[Y106-K174;T107-K174;G104-K174;H105-K174;E108-K174;G109-K174;A110-K174]
60	4	510.556	DCX	sp|Q3ZBU7|TBB4A_BOVIN Tubulin beta-4A chain OS=Bos taurus GN=TUBB4A PE=2 SV=1	LVTIIR-FPGQLNADLR	(181-186)_(242-251)	[T183-F242;T183-P243;T183-G244;T183-Q245;T183-L246;T183-N247]
61	5	634.311	sp|Q2XVP4|TBA1B_PIG Tubulin alpha-1B chain OS=Sus scrofa GN=TUBA1B PE=1 SV=1	DCX	AFVHWYVGEGMEEGEFSEAR-SGVKPR	(403-422)_(187-192)	[G410-S187;E411-S187;G412-S187;M413-S187]
62	4	634.34	sp|Q3ZBU7|TBB4A_BOVIN Tubulin beta-4A chain OS=Bos taurus GN=TUBB4A PE=2 SV=1	DCX	NSSYFVEWIPNNVK-SGVKPR	(337-350)_(187-192)	[Y340-K190]
63	4	614.091	sp|P02554|TBB_PIG	DCX	AILVDLEPGTMDSVR-SGVKPR	(63-77)_(187-192)	[V66-K190]
64	4	635.609	sp|Q2XVP4|TBA1B_PIG Tubulin alpha-1B chain OS=Sus scrofa GN=TUBA1B PE=1 SV=1	DCX	AVFVDLEPTVIDEVR-SGVKPR	(65-79)_(187-192)	[V68-K190;D69-K190;L70-K190]
65	4	699.878	sp|P02554|TBB_PIG Tubulin beta chain OS=Sus scrofa PE=1 SV=1	DCX	GHYTEGAELVDSVLDVVR-SGVKPR	(104-121)_(187-192)	[S115-K190;E111-K190]
66	5	634.311	sp|Q2XVP4|TBA1B_PIG Tubulin alpha-1B chain OS=Sus scrofa GN=TUBA1B PE=1 SV=1	DCX	AFVHWYVGEGMEEGEFSEAR-SGVKPR	(403-422)_(187-192)	[G410-K190;E411-K190;G412-K190;M413-K190;E414-K190;E415-K190;G416-K190;E417-K190;F418-K190]
67	4	593.091	sp|Q2XVP4|TBA1B_PIG	DCX	AVFVDLEPTVIDEVR-KAVR	(65-79)_(193-196)	[V68-K193]
68	4	657.36	sp|P02554|TBB_PIG Tubulin beta chain OS=Sus scrofa PE=1 SV=1	DCX	GHYTEGAELVDSVLDVVR-KAVR	(104-121)_(193-196)	[S115-K193]
69	5	551.709	sp|P02554|TBB_PIG Tubulin beta chain OS=Sus scrofa PE=1 SV=1	DCX	GHYTEGAELVDSVLDVVRK-KAVR	(104-122)_(193-196)	[Y106-K193;T107-K193;G104-K193;H105-K193]
70	4	394.221	DCX	sp|Q2XVP4|TBA1B_PIG Tubulin alpha-1B chain OS=Sus scrofa GN=TUBA1B PE=1 SV=1	KAVR-EDMAALEK	(193-196)_(423-430)	[K193-E429]
71	4	812.676	sp|Q3ZBU7|TBB4A_BOVIN Tubulin beta-4A chain OS=Bos taurus GN=TUBB4A PE=2 SV=1	DCX	LTTPTYGDLNHLVSATMSGVTTCLR-AVR	(217-241)_(194-196)	[T219-A194;T219-V195;T221-A194;T221-V195;Y222-A194;Y222-V195]
72	6	895.932	sp|Q2XVP4|TBA1B_PIG Tubulin alpha-1B chain OS=Sus scrofa GN=TUBA1B PE=1 SV=1	DCX	AYHEQLSVAEITNACFEPANQMVKCDPRHGKYMACCLLYR-AVR	(281-320)_(194-196)	[K304-A194;K304-V195;K311-A194;K311-V195]
73	5	733.01	DCX	sp|Q3ZCJ7|TBA1C_BOVIN	TAHSFEQVLTDITEAIK-EIIDLVLDRVR	(203-219)_(113-123)	[T212-I115;T212-D116;T212-L117;T212-V118;T212-L119;T212-D120;T212-R121;T212-V122;T215-I115;T215-D116;T215-L117;T215-V118;T215-L119;T215-D120;T215-R121;T215-V122]
74	4	703.383	sp|P02554|TBB_PIG Tubulin beta chain OS=Sus scrofa PE=1 SV=1	DCX	INVYYNEAAGNKYVPR-LETGVVK	(47-62)_(220-226)	[K58-L220;K58-E221]
75	4	787.7	sp|Q2XVP4|TBA1B_PIG Tubulin alpha-1B chain OS=Sus scrofa GN=TUBA1B PE=1 SV=1	DCX	VGINYQPPTVVPGGDLAKVQR-LETGVVK	(353-373)_(220-226)	[K370-L220;K370-E221]
76	5	874.226	sp|Q2T9S0|TBB3_BOVIN Tubulin beta-3 chain OS=Bos taurus GN=TUBB3 PE=1 SV=1	DCX	ECENCDCLQGFQLTHSLGGGTGSGMGTLLISK-LETGVVK	(123-154)_(220-226)	[T136-T222;T136-G223;S138-T222;S138-G223;T143-T222;T143-G223;S145-T222;S145-G223;E123-T222;C124-T222;E125-T222;N126-T222;C127-T222;D128-T222;C129-T222;L130-T222;Q131-T222;G132-T222;F133-T222;Q134-T222;L135-T222;H137-T222;L139-T222;G140-T222;G141-T222;G142-T222;G144-T222]
77	4	664.612	sp|Q3MHM5|TBB4B_BOVIN Tubulin beta-4B chain OS=Bos taurus GN=TUBB4B PE=2 SV=1	DCX	INVYYNEATGGK-KLYTLDGK	(47-58)_(227-234)	[Y50-K227;I47-K227;N48-K227;V49-K227]
78	5	607.734	sp|Q6B856|TBB2B_BOVIN	DCX	ALTVPELTQQMFDSK-KLYTLDGK	(283-297)_(227-234)	[T290-K227]
79	6	702.328	DCX	sp|Q2XVP4|TBA1B_PIG	QVTCLHDFFGDDDVFIACGPEK-YMACCLLYR	(235-256)_(312-320)	[T237-Y312;T237-M313;T237-A314;T237-C315;Q235-Y312;V236-Y312;C238-Y312;L239-Y312;H240-Y312;D241-Y312;F242-Y312;F243-Y312;G244-Y312;D245-Y312;D246-Y312;D247-Y312;V248-Y312]
80	4	992.723	sp|Q767L7|TBB5_PIG	DCX	ISVYYNEATGGKYVPR-YAQDDFSLDENECR	(47-62)_(259-272)	[K58-Q261;K58-D262]
81	4	590.307	DCX	sp|Q2XVP4|TBA1B_PIG Tubulin alpha-1B chain OS=Sus scrofa GN=TUBA1B PE=1 SV=1	VMKGNPSATAGPK-EDMAALEK	(273-285)_(423-430)	[K275-M425]
82	4	787.909	sp|Q3ZBU7|TBB4A_BOVIN Tubulin beta-4A chain OS=Bos taurus GN=TUBB4A PE=2 SV=1	DCX	NSSYFVEWIPNNVK-VMKGNPSATAGPK	(337-350)_(273-285)	[S339-K275;Y340-K275;F341-K275;V342-K275;E343-K275;W344-K275]
83	4	789.177	sp|Q2XVP4|TBA1B_PIG Tubulin alpha-1B chain OS=Sus scrofa GN=TUBA1B PE=1 SV=1	DCX	AVFVDLEPTVIDEVR-VMKGNPSATAGPK	(65-79)_(273-285)	[V68-K275;L70-K275]
84	5	757.166	sp|Q2XVP4|TBA1B_PIG Tubulin alpha-1B chain OS=Sus scrofa GN=TUBA1B PE=1 SV=1	DCX	AFVHWYVGEGMEEGEFSEAR-VMKGNPSATAGPK	(403-422)_(273-285)	[M413-K275]
85	4	536.792	DCX	sp|Q2XVP4|TBA1B_PIG Tubulin alpha-1B chain OS=Sus scrofa GN=TUBA1B PE=1 SV=1	GNPSATAGPKASPTPQK-HGK	(276-292)_(309-311)	[K285-H309]
86	4	678.1	DCX	sp|Q2XVP4|TBA1B_PIG Tubulin alpha-1B chain OS=Sus scrofa GN=TUBA1B PE=1 SV=1	GNPSATAGPKASPTPQK-EDMAALEK	(276-292)_(423-430)	[K285-E423;K285-D424]
87	4	720.877	DCX	sp|P02554|TBB_PIG Tubulin beta chain OS=Sus scrofa PE=1 SV=1	GNPSATAGPKASPTPQK-IREEYPDR	(276-292)_(155-162)	[K285-I155;K285-R156;K285-E157;K285-E158;K285-Y159;K285-P160;K285-D161]
88	4	813.166	DCX	sp|P02554|TBB_PIG Tubulin beta chain OS=Sus scrofa PE=1 SV=1	GNPSATAGPKASPTPQK-EVDEQMLNVQNK	(276-292)_(325-336)	[K285-D327;K285-E328;K285-Q329]
89	4	875.702	DCX	sp|Q3ZBU7|TBB4A_BOVIN Tubulin beta-4A chain OS=Bos taurus GN=TUBB4A PE=2 SV=1	GNPSATAGPKASPTPQK-NSSYFVEWIPNNVK	(276-292)_(337-350)	[K285-Y340;K285-F341;K285-V342]
90	5	827.4	sp|Q2XVP4|TBA1B_PIG Tubulin alpha-1B chain OS=Sus scrofa GN=TUBA1B PE=1 SV=1	DCX	AFVHWYVGEGMEEGEFSEAR-GNPSATAGPKASPTPQK	(403-422)_(276-292)	[G412-K285;M413-K285]
91	5	827.4	sp|Q2XVP4|TBA1B_PIG	DCX	AFVHWYVGEGMEEGEFSEAR-GNPSATAGPKASPTPQK	(403-422)_(276-292)	[G410-K285;E411-K285]
92	6	579.98	sp|Q2XVP4|TBA1B_PIG Tubulin alpha-1B chain OS=Sus scrofa GN=TUBA1B PE=1 SV=1	DCX	TKRSIQFVDWCPTGFK-ASPTPQKTSAK	(337-352)_(286-296)	[W346-T289;W346-S294;C347-T289;C347-S294]
93	4	413.485	DCX	sp|Q2XVP4|TBA1B_PIG Tubulin alpha-1B chain OS=Sus scrofa GN=TUBA1B PE=1 SV=1	ASPTPQKTSAK-HGK	(286-296)_(309-311)	[K292-H309]
94	4	597.57	DCX	sp|P02554|TBB_PIG Tubulin beta chain OS=Sus scrofa PE=1 SV=1	ASPTPQKTSAK-IREEYPDR	(286-296)_(155-162)	[K292-E158;K292-Y159;K292-P160;K292-D161]
95	4	759.899	DCX	sp|Q2XVP4|TBA1B_PIG Tubulin alpha-1B chain OS=Sus scrofa GN=TUBA1B PE=1 SV=1	ASPTPQKTSAKSPGPMR-EDMAALEK	(286-302)_(423-430)	[K292-E423;K292-D424]
96	4	584.049	DCX	sp|Q2XVP4|TBA1B_PIG Tubulin alpha-1B chain OS=Sus scrofa GN=TUBA1B PE=1 SV=1	ASPTPQKTSAK-EDAANNYAR	(286-296)_(97-105)	[K292-E97;K292-D98]
97	4	752.395	sp|Q3ZBU7|TBB4A_BOVIN Tubulin beta-4A chain OS=Bos taurus GN=TUBB4A PE=2 SV=1	DCX	NSSYFVEWIPNNVK-ASPTPQKTSAK	(337-350)_(286-296)	[S339-K292;Y340-K292;F341-K292]
98	4	753.663	sp|Q2XVP4|TBA1B_PIG Tubulin alpha-1B chain OS=Sus scrofa GN=TUBA1B PE=1 SV=1	DCX	AVFVDLEPTVIDEVR-ASPTPQKTSAK	(65-79)_(286-296)	[L70-K292]
99	5	663.351	sp|P02554|TBB_PIG Tubulin beta chain OS=Sus scrofa PE=1 SV=1	DCX	GHYTEGAELVDSVLDVVRK-TSAKSPGPMR	(104-122)_(293-302)	[Y106-K296;T107-K296;G104-K296;H105-K296;E108-K296;G109-K296]
100	4	1143.33	sp|Q2XVP4|TBA1B_PIG Tubulin alpha-1B chain OS=Sus scrofa GN=TUBA1B PE=1 SV=1	DCX	AYHEQLSVAEITNACFEPANQMVK-TSAKSPGPMRRSK	(281-304)_(293-305)	[Y282-K296;S287-K296;T292-K296;A281-K296;H283-K296;E284-K296;Q285-K296;L286-K296;V288-K296;A289-K296;E290-K296;I291-K296;N293-K296;A294-K296;C295-K296;F296-K296]
101	4	575.827	sp|P81948|TBA4A_BOVIN Tubulin alpha-4A chain OS=Bos taurus GN=TUBA4A PE=1 SV=2	DCX	AVFVDLEPTVIDEIR-RSK	(65-79)_(303-305)	[T73-R303]
102	5	811.593	DCX	sp|Q2XVP4|TBA1B_PIG	SKSPADSGNDQDANGTSSSQLSTPK-LDHKFDLMYAK	(304-328)_(391-401)	[S304-K394;K305-H393;K305-K394;K305-F395;K305-D396;K305-L397;K305-M398;S306-K394]
103	5	609.293	DCX	sp|Q3ZBU7|TBB4A_BOVIN Tubulin beta-4A chain OS=Bos taurus GN=TUBB4A PE=2 SV=1	SKSPADSGNDQDANGTSSSQLSTPK-HGR	(304-328)_(307-309)	[K305-H307]
104	4	378.958	DCX	sp|Q2XVP4|TBA1B_PIG Tubulin alpha-1B chain OS=Sus scrofa GN=TUBA1B PE=1 SV=1	KHK-EDMAALEK	(345-347)_(423-430)	[K345-E423;K345-D424;K345-M425]
105	4	895.67	DCX	sp|Q2XVP4|TBA1B_PIG Tubulin alpha-1B chain OS=Sus scrofa GN=TUBA1B PE=1 SV=1	SKSPADSGNDQDANGTSSSQLSTPK-EDMAALEK	(304-328)_(423-430)	[K305-E423]
106	5	750.96	DCX	sp|P02554|TBB_PIG Tubulin beta chain OS=Sus scrofa PE=1 SV=1	SKSPADSGNDQDANGTSSSQLSTPK-IREEYPDR	(304-328)_(155-162)	[K305-I155;K305-R156;K305-E157;K305-E158]
107	4	895.67	DCX	sp|Q2XVP4|TBA1B_PIG Tubulin alpha-1B chain OS=Sus scrofa GN=TUBA1B PE=1 SV=1	SKSPADSGNDQDANGTSSSQLSTPK-EDMAALEK	(304-328)_(423-430)	[K305-E429]
108	4	976.464	DCX	sp|Q3ZBU7|TBB4A_BOVIN Tubulin beta-4A chain OS=Bos taurus GN=TUBB4A PE=2 SV=1	SKSPADSGNDQDANGTSSSQLSTPK-ISEQFTAMFR	(304-328)_(381-390)	[K305-I381;K305-S382;K305-E383;K305-Q384]
109	4	1007.98	DCX	sp|P02554|TBB_PIG Tubulin beta chain OS=Sus scrofa PE=1 SV=1	SKSPADSGNDQDANGTSSSQLSTPK-INVYYNEAAGNK	(304-328)_(47-58)	[K305-Y50;K305-Y51;K305-N52;K305-E53]
110	4	1093.27	DCX	sp|Q3ZBU7|TBB4A_BOVIN Tubulin beta-4A chain OS=Bos taurus GN=TUBB4A PE=2 SV=1	SKSPADSGNDQDANGTSSSQLSTPK-NSSYFVEWIPNNVK	(304-328)_(337-350)	[K305-N337;K305-S338;K305-S339;K305-Y340;K305-F341;K305-V342]
111	5	927.249	DCX	sp|P02554|TBB_PIG Tubulin beta chain OS=Sus scrofa PE=1 SV=1	SKSPADSGNDQDANGTSSSQLSTPK-GHYTEGAELVDSVLDVVR	(304-328)_(104-121)	[K305-G104;K305-H105;K305-Y106;K305-T107;K305-E108;K305-G109;K305-A110;K305-E111;K305-L112]
112	4	718.634	DCX	sp|Q2XVP4|TBA1B_PIG Tubulin alpha-1B chain OS=Sus scrofa GN=TUBA1B PE=1 SV=1	SKQSPISTPTSPGSLRK-EDMAALEK	(329-345)_(423-430)	[K330-E423;K330-D424;K330-M425;K330-A426;K330-A427;K330-L428;K330-E429]
113	5	1001.46	DCX	sp|Q2XVP4|TBA1B_PIG Tubulin alpha-1B chain OS=Sus scrofa GN=TUBA1B PE=1 SV=1	SKSPADSGNDQDANGTSSSQLSTPK-AFVHWYVGEGMEEGEFSEAR	(304-328)_(403-422)	[S310-M413;S310-E414]
114	5	652.318	DCX	sp|Q3ZBU7|TBB4A_BOVIN Tubulin beta-4A chain OS=Bos taurus GN=TUBB4A PE=2 SV=1	SKSPADSGNDQDANGTSSSQLSTPKSK-HGR	(304-330)_(307-309)	[K328-H307]
115	4	895.67	DCX	sp|Q2XVP4|TBA1B_PIG	SPADSGNDQDANGTSSSQLSTPKSK-EDMAALEK	(306-330)_(423-430)	[K328-E423;K328-D424;K328-M425;K328-A426;K328-A427]
116	5	1001.46	DCX	sp|Q2XVP4|TBA1B_PIG Tubulin alpha-1B chain OS=Sus scrofa GN=TUBA1B PE=1 SV=1	SPADSGNDQDANGTSSSQLSTPKSK-AFVHWYVGEGMEEGEFSEAR	(306-330)_(403-422)	[K328-M413;K328-E414]
117	4	545.302	DCX	sp|Q2XVP4|TBA1B_PIG Tubulin alpha-1B chain OS=Sus scrofa GN=TUBA1B PE=1 SV=1	SKQSPISTPTSPGSLR-HGK	(329-344)_(309-311)	[K330-H309]
118	4	552.304	DCX	sp|Q3ZBU7|TBB4A_BOVIN Tubulin beta-4A chain OS=Bos taurus GN=TUBB4A PE=2 SV=1	SKQSPISTPTSPGSLR-HGR	(329-344)_(307-309)	[K330-H307]
119	4	821.676	DCX	sp|P02554|TBB_PIG Tubulin beta chain OS=Sus scrofa PE=1 SV=1	SKQSPISTPTSPGSLR-EVDEQMLNVQNK	(329-344)_(325-336)	[K330-D327;K330-E328;K330-Q329;K330-M330]
120	4	884.212	DCX	sp|Q3ZBU7|TBB4A_BOVIN Tubulin beta-4A chain OS=Bos taurus GN=TUBB4A PE=2 SV=1	SKQSPISTPTSPGSLR-NSSYFVEWIPNNVK	(329-344)_(337-350)	[K330-S339;K330-Y340;K330-F341;K330-V342;K330-E343]
121	4	885.48	DCX	sp|Q2XVP4|TBA1B_PIG Tubulin alpha-1B chain OS=Sus scrofa GN=TUBA1B PE=1 SV=1	SKQSPISTPTSPGSLR-AVFVDLEPTVIDEVR	(329-344)_(65-79)	[K330-V68;K330-D69;K330-L70;K330-E71]
122	5	834.208	sp|Q2XVP4|TBA1B_PIG Tubulin alpha-1B chain OS=Sus scrofa GN=TUBA1B PE=1 SV=1	DCX	AFVHWYVGEGMEEGEFSEAR-SKQSPISTPTSPGSLR	(403-422)_(329-344)	[M413-K330]
123	4	632.828	DCX	sp|Q2XVP4|TBA1B_PIG Tubulin alpha-1B chain OS=Sus scrofa GN=TUBA1B PE=1 SV=1	QSPISTPTSPGSLR-EDMAALEK	(331-344)_(423-430)	[S335-A426;S335-A427;S335-L428;S335-E429;T336-A426;T336-A427;T336-L428;T336-E429]
124	4	642.097	sp|P02554|TBB_PIG Tubulin beta chain OS=Sus scrofa PE=1 SV=1	DCX	GHYTEGAELVDSVLDVVR-KHK	(104-121)_(345-347)	[Y106-K345]
*Only crosslinking sites between DCX and Tubulin dimer are shown.
