# Supplementary material for: Doublecortin engages the microtubule lattice through a cooperative binding mode involving its C-terminal domain
Source: eLife. 2022 Apr 29;11:e66975. doi: 10.7554/eLife.66975 (PMC9122500; doi:10.7554/eLife.66975)
Supplement: Supplementary file 2. — Column titles with star are defined at the bottom of the table. [file elife-66975-supp2.xlsx]

## Sheet: Sheet1
Table S2. The analysis output of all integrative structural modeling runs. Column titles with star are defined at the bottom of the table.
Modeling scenario	Modeling scenario	MT-DCX XLs	DCX-DCX XLs	Sampling precision*/ Clustering threshold*	Cluster % population (1st/ 2nd cluster)	Cluster precision* (1st / 2nd cluster)	Cluster XL fraction satisfaction* (1st /2nd cluster)
1	MT-NDC-XL	LC-SDA	-	18.0/ 38.0	48/ 36	23.4/ 25.0	1.0/ 0.94
2	MT-NDC-EM-XL	LC-SDA	-	10.9/ 10.9	80/ 10	6.0/ 7.6	0.89
3	MT-CDC-XL	LC-SDA	-	24.7/ 41.0	50/ 23	27/ 30	1.0/ 0.9
4	MT-CDC-EM-XL	LC-SDA	-	11.8/ 11.8	58/ 25	5.9/ 8.8	0.75
5	MT-DCXdimer-Lat-glob	-	LC-SDA	17.2/ 46.6	98	23.8	0.98
6	MT-DCXdimer-Lat-open	-	LC-SDA	20.0/ 46.6	100	24.7	0.98
7	MT-DCXdimer-Lon-glob	-	LC-SDA	17.7/ 46.6	99	23.3	0.98
8	MT-DCXdimer-Lon-open	-	LC-SDA	17.7/ 46.6	100	23.3	0.98
9	MT-DCXdimer-Dia1-glob	-	LC-SDA	15.0/ 46.6	98	21.4	0.96
10	MT-DCXdimer-Dia1-open	-	LC-SDA	16.8/ 46.6	100	21.9	0.97
11	MT-DCXdimer-Dia2-glob	-	LC-SDA	15.4/ 46.6	99	21.4	0.98
12	MT-DCXdimer-Dia2-open	-	LC-SDA	17.2/ 46.6	98	21.4	0.98
13	MT-DCXdimer-Lat-glob	LC-SDA	LC-SDA	14.0/57.0	99	30.4	0.99
14	MT-DCXdimer-Lat-open	LC-SDA	LC-SDA	14.9/ 57.0	100	29	0.98
15	MT-DCXdimer-Lon-glob	LC-SDA	LC-SDA	14.4/57.0	100	28.8	0.99
16	MT-DCXdimer-Lon-open	LC-SDA	LC-SDA	17.2/ 57.0	100	32.6	0.99
17	MT-DCXdimer-Dia1-glob	LC-SDA	LC-SDA	14.9/ 50.0	99	26.7	0.99
18	MT-DCXdimer-Dia1-open	LC-SDA	LC-SDA	17.7/ 50.0	100	26.1	0.99
19	MT-DCXdimer-Dia2-glob	LC-SDA	LC-SDA	19.6/ 50.0	99	27.5	0.99
20	MT-DCXdimer-Dia2-open	LC-SDA	LC-SDA	17.2/ 50.0	100	26.1	0.99
21	MT-NDC-XL	DSS	-	34.2/ 81.2	33/ 14	72.3/ 77.2	1.0/ 0.5
22	MT-NDC-XL	EDC	-	33.6/ 54.3	28/ 20	35.7/ 37.7	1.0/ 0.88
23	MT-CDC-XL	DSS	-	24.1/ 41.0	43/ 40	26.4/ 23.3	0.94/ 1.0
24	MT-CDC-XL	EDC	-	12.3/ 41.0	80/ 12	27.0/ 22.9	1.0/ 0.97
Sampling precision: The RMSD threshold at which clustering produces indistinguishable results for two independent sets of computed models Clustering threshold: The RMSD threshold at which clustering was performed. Cluster precision: The average RMSD to the centroid model for each cluster. Cluster XL fraction satisfaction: The fraction of crosslinks which are satisfied at least in one configuratio…
