# Supplementary material for: Doublecortin engages the microtubule lattice through a cooperative binding mode involving its C-terminal domain
Source: eLife. 2022 Apr 29;11:e66975. doi: 10.7554/eLife.66975 (PMC9122500; doi:10.7554/eLife.66975)
Supplement: Supplementary file 3. [file elife-66975-supp3.xlsx]

## Sheet: Sheet1
Table S3. Complete list of unique DCX-DCX crosslinking sites (and their associated crosslinked peptides) identified using isotope-assisted chemical crosslinking.
Id	z	m/z	Pr1	Pr2	Peptide1_Peptide2	(start1-stop1)_(start2-stop2)	Selected Sites	Group (1=intra, 2-inter, 3=inter-intra)
1	4	608.313	DCX(H)	DCX(H)	ASPTPQKTSAK-GNPSATAGPK	(286-296)_(276-285)	[A286-S279]	1
2	4	776.838	DCX(H)	DCX(H)	YAQDDFSLDENECR-ASPTPQKTSAK	(259-272)_(286-296)	[D262-S294]	1
3	4	623.576	DCX(L)	DCX(L)	GIVYAVSSDRFR-FYRNGDR	(67-78)_(57-63)	[G67-Y58;I68-Y58;V69-Y58]	1
4	4	988.959	DCX(L)	DCX(L)	KIGSMDELEEGESYVCSSDNFFK-YIYTIDGSR	(112-134)_(103-111)	[K112-Y103;I113-Y103]	1
5	4	815.138	DCX(H)	DCX(H)	TSANMKAPQSLASSNSAQAR-TLQALSNEK	(152-171)_(42-50)	[K157-Q44;K157-A45;K157-L46]	1
6	4	517.042	DCX(H)	DCX(H)	DFVRPKLVTIIR-ENK	(175-186)_(172-174)	[K180-E172]	1
7	4	1128.56	DCX(L)	DCX(L)	SKSPADSGNDQDANGTSSSQLSTPKSK-QSPISTPTSPGSLR	(304-330)_(331-344)	[K328-Q331;S329-Q331]	1
8	5	594.934	DCX(L)	DCX(L)	TAHSFEQVLTDITEAIK-LETGVVKK	(203-219)_(220-227)	[L211-T222;L211-K226]	1
9	4	765.661	DCX(L)	DCX(L)	NVNPNWSVNVKTSANMK-KVEYTK	(141-157)_(135-140)	[N143-T139]	1
10	4	400.742	DCX(L)	DCX(L)	NMRGSR-KAVR	(17-22)_(193-196)	[N17-K193]	1
11	4	608.04	DCX(L)	DCX(L)	YAQDDFSLDENECR-KAVR	(259-272)_(193-196)	[Q261-K193]	1
12	4	731.323	DCX(H)	DCX(H)	YAQDDFSLDENECR-KLYTLDGK	(259-272)_(227-234)	[Q261-K227]	1
13	4	386.732	DCX(L)	DCX(L)	TLQALSNEK-KAK	(42-50)_(51-53)	[Q44-K51;A45-K51]	1
14	4	1169.51	DCX(H)	DCX(H)	IGSMDELEEGESYVCSSDNFFK-VEYTKNVNPNWSVNVK	(113-134)_(136-151)	[S115-Y138;S115-T139;S115-K140;S115-N141;S115-V142;S124-Y138;S124-T139;S124-K140;S124-N141;S124-V142;Y125-Y138;Y125-T139;Y125-K140;Y125-N141;Y125-V142;I113-Y138;I113-T139;I113-K140;G114-Y138;G114-T139;G114-K140;M116-Y138;M116-T139;M116-K140;D117-Y138;D117-T139;D117-K140;E118-Y138;E118-T139;E118-K140;L119-Y138;L119-T139;L119-K140;E120-Y138;E120-T139;E120-K140;E121-Y138;E121-T139;E121-K140;G122-Y13…	1
15	4	1190.05	DCX(L)	DCX(L)	IGSMDELEEGESYVCSSDNFFK-TSANMKAPQSLASSNSAQAR	(113-134)_(152-171)	[S124-T152;S124-S153;S124-A154;S124-N155;S124-M156;S124-K157;Y125-T152;Y125-S153;Y125-A154;Y125-N155;Y125-M156;Y125-K157;G122-T152;G122-S153;G122-K157;E123-T152;E123-S153;E123-K157]	1
16	4	936.446	DCX(H)	DCX(H)	NVNPNWSVNVKTSANMK-APQSLASSNSAQAR	(141-157)_(158-171)	[S147-A158;K151-A158]	1
17	4	493.758	DCX(L)	DCX(L)	APQSLASSNSAQAR-ENK	(158-171)_(172-174)	[S164-E172;S165-E172]	1
18	4	594.581	DCX(L)	DCX(L)	VMKGNPSATAGPK-ASPTPQK	(273-285)_(286-292)	[S279-A286]	1
19	4	637.855	DCX(L)	DCX(L)	GNPSATAGPKASPTPQK-LETGVVK	(276-292)_(220-226)	[S279-L220;S279-E221;T281-L220;T281-E221;K285-L220;K285-E221]	1
20	4	601.832	DCX(L)	DCX(L)	ASPTPQKTSAK-GNPSATAGPK	(286-296)_(276-285)	[S287-G276;S287-N277;S287-P278;S287-P284;A286-S279;A286-T281]	1
21	4	919.95	DCX(L)	DCX(L)	SKSPADSGNDQDANGTSSSQLSTPK-TLQALSNEK	(304-328)_(42-50)	[S304-L46;S304-S47;S304-N48;S304-E49;K305-L46;K305-S47;K305-N48;K305-E49;S306-L46;S306-S47;S306-N48;S306-E49;S310-L46;S310-S47;S310-N48;S310-E49;P307-S47;A308-S47;D309-S47;G311-S47;N312-S47;D313-S47;Q314-S47;D315-S47;A316-S47;N317-S47]	1
22	5	874.397	DCX(H)	DCX(H)	SKSPADSGNDQDANGTSSSQLSTPK-SKQSPISTPTSPGSLR	(304-328)_(329-344)	[S304-S329;S304-K330;S304-Q331;S304-S332;K305-S329;K305-K330;K305-Q331;K305-S332;S306-S329;S306-K330;S306-Q331;S306-S332;S310-S329;S310-K330;S310-Q331;S310-S332;P307-S329;P307-K330;P307-S332;A308-S329;A308-K330;A308-S332;D309-S329;D309-K330;D309-S332;G311-S329;G311-K330;G311-S332;N312-S329;N312-K330;N312-S332;D313-S329;D313-K330;D313-S332;Q314-S329;Q314-K330;Q314-S332;D315-S329;D315-K330;D315-S33…	1
23	5	874.397	DCX(H)	DCX(H)	SKSPADSGNDQDANGTSSSQLSTPK-SKQSPISTPTSPGSLR	(304-328)_(329-344)	[S306-Q331;S306-S332;S310-Q331;S310-S332;T319-Q331;T319-S332;P307-S332;A308-S332;D309-S332;G311-S332;N312-S332;D313-S332;Q314-S332;D315-S332;A316-S332;N317-S332;G318-S332]	1
24	5	874.397	DCX(H)	DCX(H)	SKSPADSGNDQDANGTSSSQLSTPK-SKQSPISTPTSPGSLR	(304-328)_(329-344)	[S310-Q331;S310-S332;G311-S332;N312-S332;D313-S332;Q314-S332;D315-S332;A316-S332]	1
25	4	920.727	DCX(L)	DCX(L)	TSANMKAPQSLASSNSAQAR-NVNPNWSVNVK	(152-171)_(141-151)	[T152-P144;T152-S147;T152-V148;T152-N149;T152-V150;S153-P144;S153-S147;S153-V148;S153-N149;S153-V150;K157-P144;K157-S147;K157-V148;K157-N149;K157-V150;A154-S147;N155-S147;M156-S147;A158-S147]	1
26	5	753.018	DCX(L)	DCX(L)	TAHSFEQVLTDITEAIK-LETGVVKKLYTLDGK	(203-219)_(220-234)	[T212-T222;T212-G223;T212-V224;T212-V225;T212-K226;T215-T222;T215-G223;T215-V224;T215-V225;T215-K226;L211-T222;L211-K226;D213-T222;D213-K226;I214-T222;I214-K226;E216-T222;E216-K226;A217-T222;A217-K226;I218-T222;I218-K226]	1
27	4	767.141	DCX(H)	DCX(H)	TAHSFEQVLTDITEAIK-KLYTLDGK	(203-219)_(227-234)	[T215-K227;T215-L228;D213-K227;I214-K227;E216-K227;A217-K227]	1
28	4	600.812	DCX(H)	DCX(H)	VMKGNPSATAGPK-ASPTPQK	(273-285)_(286-292)	[T281-A286]	1
29	4	1133.07	DCX(L)	DCX(L)	SKSPADSGNDQDANGTSSSQLSTPKSK-QSPISTPTSPGSLR	(304-330)_(331-344)	[T319-Q331;S320-Q331;S321-Q331;S322-Q331;S325-Q331;T326-Q331;K328-Q331;S329-Q331]	1
30	4	451.751	DCX(L)	DCX(L)	TLQALSNEK-DKTSR	(42-50)_(12-16)	[T42-D12;T42-K13;S47-D12;S47-K13;Q44-K13;A45-K13;L46-K13]	1
31	4	711.13	DCX(H)	DCX(H)	TAHSFEQVLTDITEAIK-VLLNKK	(203-219)_(197-202)	[V210-K201;L211-K201]	1
32	5	607.733	DCX(L)	DCX(L)	TAHSFEQVLTDITEAIK-KLYTLDGK	(203-219)_(227-234)	[V210-K227;L211-K227]	1
33	4	804.126	DCX(L)	DCX(L)	YAQDDFSLDENECR-VMKGNPSATAGPK	(259-272)_(273-285)	[Y259-K275;A260-K275;Q261-K275;D262-K275;D263-K275;F264-K275]	1
34	4	421.479	DCX(H)	DCX(H)	GIVYAVSSDR-KVR	(67-76)_(54-56)	[Y70-K54]	1
35	4	718.349	DCX(L)	DCX(L)	SPADSGNDQDANGTSSSQLSTPK-KHK	(306-328)_(345-347)	[A316-K345;N317-K345]	3
36	5	690.927	DCX(H)	DCX(H)	YAQDDFSLDENECR-DFVRPKLVTIIR	(259-272)_(175-186)	[D262-K180;D263-K180;F264-K180]	3
37	4	804.126	DCX(L)	DCX(L)	YAQDDFSLDENECR-VMKGNPSATAGPK	(259-272)_(273-285)	[D262-K275;D263-K275]	3
38	4	747.593	DCX(L)	DCX(L)	YAQDDFSLDENECR-TSAKSPGPMR	(259-272)_(293-302)	[D262-K296]	3
39	4	455.268	DCX(L)	DCX(L)	SFDALLADLTR-KVR	(79-89)_(54-56)	[D81-K54;A82-K54;L83-K54;L84-K54]	3
40	4	651.832	DCX(L)	DCX(L)	TSANMKAPQSLASSNSAQAR-ENK	(152-171)_(172-174)	[K157-E172]	3
41	4	470.03	DCX(L)	DCX(L)	KLYTLDGK-LETGVVK	(227-234)_(220-226)	[K227-L220;K227-T222;L228-T222]	3
42	4	556.044	DCX(H)	DCX(H)	VMKGNPSATAGPK-LETGVVK	(273-285)_(220-226)	[K275-T222]	3
43	4	883.634	DCX(H)	DCX(H)	SPADSGNDQDANGTSSSQLSTPK-TSAKSPGPMR	(306-328)_(293-302)	[N312-T293;N312-S294;N312-K296;D313-T293;D313-S294;D313-K296;Q314-T293;Q314-S294;Q314-K296;D315-T293;D315-S294;D315-K296;A316-T293;A316-S294;A316-K296;N317-T293;N317-S294;N317-K296]	3
44	5	687.139	DCX(H)	DCX(L)	YAQDDFSLDENECR-DFVRPKLVTIIR	(259-272)_(175-186)	[Q261-K180]	3
45	4	812.85	DCX(H)	DCX(H)	YAQDDFSLDENECR-VMKGNPSATAGPK	(259-272)_(273-285)	[Q261-K275]	3
46	4	592.777	DCX(L)	DCX(L)	YAQDDFSLDENECR-KHK	(259-272)_(345-347)	[Q261-K345;D262-K345;D263-K345;F264-K345]	3
47	4	653.05	DCX(L)	DCX(H)	YAQDDFSLDENECR-SGVKPR	(259-272)_(187-192)	[Q261-S187;Q261-K190;D262-S187;D262-K190;D263-S187;D263-K190]	3
48	4	873.165	DCX(L)	DCX(L)	SPADSGNDQDANGTSSSQLSTPK-TSAKSPGPMR	(306-328)_(293-302)	[Q314-K296;D315-K296;A316-K296;N317-K296]	3
49	4	1038.22	DCX(H)	DCX(H)	SPADSGNDQDANGTSSSQLSTPK-SKQSPISTPTSPGSLR	(306-328)_(329-344)	[Q314-S329;Q314-K330;D315-S329;D315-K330;A316-S329;A316-K330]	3
50	4	904.653	DCX(H)	DCX(H)	SPADSGNDQDANGTSSSQLSTPK-ASPTPQKTSAK	(306-328)_(286-296)	[Q314-T289;D315-T289;A316-T289]	3
51	4	405.477	DCX(H)	DCX(H)	TLQALSNEK-KVR	(42-50)_(54-56)	[Q44-K54]	3
52	4	747.593	DCX(L)	DCX(L)	YAQDDFSLDENECR-TSAKSPGPMR	(259-272)_(293-302)	[S265-A295;S265-K296;D262-K296;D263-K296;F264-K296]	3
53	4	592.777	DCX(L)	DCX(L)	YAQDDFSLDENECR-KHK	(259-272)_(345-347)	[S265-K345;Q261-K345;D262-K345;D263-K345;F264-K345]	3
54	4	901.889	DCX(H)	DCX(H)	GNPSATAGPKASPTPQK-YAQDDFSLDENECR	(276-292)_(259-272)	[S279-Q261;S279-D262;T281-Q261;T281-D262;K285-Q261;K285-D262]	3
55	4	710.605	DCX(H)	DCX(H)	GNPSATAGPKASPTPQK-TLQALSNEK	(276-292)_(42-50)	[S279-Q44;S279-A45;S279-L46;S279-E49;T281-Q44;T281-A45;T281-L46;T281-E49;K285-Q44;K285-A45;K285-L46;K285-E49]	3
56	4	883.634	DCX(H)	DCX(H)	SPADSGNDQDANGTSSSQLSTPK-TSAKSPGPMR	(306-328)_(293-302)	[S310-A295;S310-K296;G311-K296;N312-K296;D313-K296;Q314-K296;D315-K296;A316-K296]	3
57	4	718.349	DCX(L)	DCX(L)	SPADSGNDQDANGTSSSQLSTPK-KHK	(306-328)_(345-347)	[S310-K345;G311-K345;N312-K345;D313-K345;Q314-K345;D315-K345;A316-K345;N317-K345]	3
58	4	894.184	DCX(L)	DCX(L)	SPADSGNDQDANGTSSSQLSTPK-ASPTPQKTSAK	(306-328)_(286-296)	[S310-P288;S310-T289;S310-P290;S310-Q291;S310-K292;G311-T289;G311-K292;N312-T289;N312-K292;D313-T289;D313-K292;Q314-T289;Q314-K292;D315-T289;D315-K292;A316-T289;A316-K292]	3
59	4	1026	DCX(L)	DCX(L)	SPADSGNDQDANGTSSSQLSTPK-SKQSPISTPTSPGSLR	(306-328)_(329-344)	[S310-S329;S310-K330;S310-Q331;G311-S329;G311-K330;N312-S329;N312-K330;D313-S329;D313-K330;Q314-S329;Q314-K330;D315-S329;D315-K330;A316-S329;A316-K330;N317-S329;N317-K330]	3
60	4	910.4	DCX(H)	DCX(H)	SKQSPISTPTSPGSLR-YAQDDFSLDENECR	(329-344)_(259-272)	[S329-D262;S329-D263;K330-D262;K330-D263;S332-D262;S332-D263]	3
61	4	907.469	DCX(L)	DCX(L)	TSANMKAPQSLASSNSAQAR-SLSDNINLPQGVR	(152-171)_(90-102)	[T152-S90;T152-L91;T152-S92;T152-D93;S153-S90;S153-L91;S153-S92;S153-D93;K157-S90;K157-L91;K157-S92;K157-D93;A154-S90;A154-S92;N155-S90;N155-S92;M156-S90;M156-S92;A158-S90;A158-S92]	3
62	5	514.89	DCX(L)	DCX(L)	TAHSFEQVLTDITEAIK-KAVR	(203-219)_(193-196)	[T212-K193;T215-K193;V210-K193;L211-K193;D213-K193;I214-K193]	3
63	4	767.141	DCX(H)	DCX(H)	TAHSFEQVLTDITEAIK-KLYTLDGK	(203-219)_(227-234)	[T212-K227;T212-L228;T215-K227;T215-L228;V210-K227;L211-K227;D213-K227;I214-K227;E216-K227]	3
64	5	514.89	DCX(L)	DCX(L)	TAHSFEQVLTDITEAIK-KAVR	(203-219)_(193-196)	[T215-K193;E216-K193]	3
65	4	418.506	DCX(H)	DCX(H)	LETGVVK-VLLNKK	(220-226)_(197-202)	[T222-L199;T222-N200;T222-K201;L220-K201]	3
66	4	398.488	DCX(H)	DCX(L)	LETGVVK-SGVKPR	(220-226)_(187-192)	[T222-V189;T222-K190;L220-K190]	3
67	5	581.86	DCX(H)	DCX(H)	SPADSGNDQDANGTSSSQLSTPK-KHK	(306-328)_(345-347)	[T319-K345;A316-K345;N317-K345;G318-K345]	3
68	4	755.819	DCX(H)	DCX(H)	YAQDDFSLDENECR-TSAKSPGPMR	(259-272)_(293-302)	[Y259-T293;Y259-S294;Y259-A295;Y259-K296;S265-T293;S265-S294;S265-A295;S265-K296;A260-T293;A260-S294;A260-K296;Q261-T293;Q261-S294;Q261-K296;Q261-S297;D262-T293;D262-S294;D262-K296;D262-S297;D263-T293;D263-S294;D263-K296;D263-S297;F264-T293;F264-S294;F264-K296;F264-S297;L266-T293;L266-S294;L266-K296;D267-T293;D267-S294;D267-K296;E268-T293;E268-S294;E268-K296;N269-T293;N269-S294;N269-K296;E270-T29…	3
70	4	608.04	DCX(L)	DCX(L)	YAQDDFSLDENECR-KAVR	(259-272)_(193-196)	[Q261-K193;D262-K193;D263-K193;F264-K193]	2
71	4	454.032	DCX(L)	DCX(L)	LETGVVKK-LETGVVK	(220-227)_(220-226)	[K226-T222]	2
72	5	618.492	DCX(L)	DCX(L)	YAQDDFSLDENECR-ENKDFVRPK	(259-272)_(172-180)	[S265-K174;Q261-K174;D262-K174;D263-K174;F264-K174]	2
73	4	1001.69	DCX(H)	DCX(L)	TSANMKAPQSLASSNSAQAR-YAQDDFSLDENECR	(152-171)_(259-272)	[T152-Q261;T152-D262;T152-D263;S153-Q261;S153-D262;S153-D263;K157-Q261;K157-D262;K157-D263]	2
74	4	357.964	DCX(H)	DCX(H)	LETGVVK-KAVR	(220-226)_(193-196)	[T222-K193;L220-K193]	2
